# Supplementary material
Source: MDPI journal article supplement (https://www.mdpi.com/2813-2084/2/4/23)
Supplement: s1 [file s1]

## Supplement File S1

Table S1: MEDLINE Search Strategy

| Set | Search Statement                                                                                                                                                                                                                                                                                                                                                      |
|-----|-----------------------------------------------------------------------------------------------------------------------------------------------------------------------------------------------------------------------------------------------------------------------------------------------------------------------------------------------------------------------|
| 1.  | 360 degree video.mp.                                                                                                                                                                                                                                                                                                                                                  |
| 2.  | Immersive learning.mp.                                                                                                                                                                                                                                                                                                                                                |
| 3.  | ((student* or undergraduate) adj3 (nurs* or midwi* or maternity)).mp. [mp=title, book title, abstract, original title, name of substance word, subject heading word, floating sub-heading word, keyword heading word, organism supplementary concept word, protocol supplementary concept word, rare disease supplementary concept word, unique identifier, synonyms] |
| 4.  | exp Education, Nursing/                                                                                                                                                                                                                                                                                                                                               |
| 5.  | 360 video.mp. [mp=title, book title, abstract, original title, name of substance word, subject heading word, floating sub-heading word, keyword heading word, organism supplementary concept word, protocol supplementary concept word, rare disease supplementary concept word, unique identifier, synonyms]                                                         |
| 6.  | exp Virtual Reality/                                                                                                                                                                                                                                                                                                                                                  |
| 7.  | VR.mp. [mp=title, book title, abstract, original title, name of substance word, subject heading word, floating sub-heading word, keyword heading word, organism supplementary concept word, protocol supplementary concept word, rare disease supplementary concept word, unique identifier, synonyms]                                                                |
| 8.  | exp Augmented Reality/                                                                                                                                                                                                                                                                                                                                                |
| 9.  | AR.mp.                                                                                                                                                                                                                                                                                                                                                                |
| 10. | Extended reality.mp.                                                                                                                                                                                                                                                                                                                                                  |
| 11. | XR.mp.                                                                                                                                                                                                                                                                                                                                                                |
| 12. | midwifery education.mp.                                                                                                                                                                                                                                                                                                                                               |
| 13. | 1 or 2 or 5 or 6 or 7 or 8 or 9 or 10 or 11                                                                                                                                                                                                                                                                                                                           |
| 14. | 3 or 4 or 12                                                                                                                                                                                                                                                                                                                                                          |
| 15. | 13 and 14                                                                                                                                                                                                                                                                                                                                                             |
