# Supplementary material
Source: MDPI journal article supplement (https://www.mdpi.com/2813-2084/2/4/23)
Supplement: s1 [file s1]

## Supplement File S2

Table S2: Outcome Measures Using Kirkpatrick's Evaluation Framework.

| Study                      | Level 1                                                        |                                                        | Level 2                                                                   |                                                                   |                                                        |                                                        |                                              |
|----------------------------|----------------------------------------------------------------|--------------------------------------------------------|---------------------------------------------------------------------------|-------------------------------------------------------------------|--------------------------------------------------------|--------------------------------------------------------|----------------------------------------------|
|                            | Perception                                                     | Satisfaction                                           | Knowledge                                                                 | Skill                                                             | Confidence and Anxiety                                 | Attitude and Motivation                                | Critical Thinking and Clinical Reasoning     |
| Chang et al., 2022 [27]    | Interview and open-ended questions                             | Learning satisfaction scale                            | MCQs, 20 items                                                            | -                                                                 | -                                                      | Learning attitude scale<br>Learning motivation scale   | Critical thinking disposition scale          |
| Yu and Yang, 2022 [49]     | -                                                              | Using 3 items, 5-point scale                           | Content related tool, 20 items                                            | Content related tool                                              | Scale for simulation studies; Koran language           | -                                                      | -                                            |
| Yu et al., 2021 [48]       | Debriefing                                                     | Using 3 items, 5-point scale                           | High-Risk Neonatal Infection Control Competency Scale Knowledge, 28 items | High-Risk Neonatal Infection Control Competency Scale performance | -                                                      | -                                                      | -                                            |
| Thompson et al., 2020 [46] | Perceived engagement questionnaire (PEQ)                       | -                                                      | -                                                                         | -                                                                 | -                                                      | -                                                      | -                                            |
| Smith et al., 2021 [43]    | -                                                              | NLN Satisfaction and Self-Confidence in Learning scale | -                                                                         | Decontamination Checklist                                         | NLN Satisfaction and Self-Confidence in Learning scale | -                                                      | -                                            |
| Siah et al., 2022 [42]     | Perceptions of nursing-related aspects of peri-operative scale | -                                                      | -                                                                         | -                                                                 | Researcher-developed 5-point scale                     | Researcher-developed 5-point scale to measure attitude | -                                            |
| Jeong et al., 2022 [35]    | -                                                              | Numerical rating scale                                 | 10 questions based on the "Guidelines for Coronavirus                     | -                                                                 | Self-efficacy for nursing care of                      | -                                                      | Clinical reasoning capability, 5-point scale |

|                            |                                                                                                           |                                                                                               |                                                                         |                                                    |                                                                                    |                                                                                                                                                             |                                                                                                   |
|----------------------------|-----------------------------------------------------------------------------------------------------------|-----------------------------------------------------------------------------------------------|-------------------------------------------------------------------------|----------------------------------------------------|------------------------------------------------------------------------------------|-------------------------------------------------------------------------------------------------------------------------------------------------------------|---------------------------------------------------------------------------------------------------|
|                            |                                                                                                           |                                                                                               | Infectious Disease-19 Response"                                         |                                                    | respiratory infectious diseases, 5-point scale                                     |                                                                                                                                                             |                                                                                                   |
| Giordano et al., 2020 [33] | -                                                                                                         | -                                                                                             | Opioid Overdose Knowledge Scale                                         | -                                                  | -                                                                                  | Opioid Overdose Attitudes Scale                                                                                                                             | -                                                                                                 |
| Smith et al., 2018 [44]    | -                                                                                                         | -                                                                                             | 20 questions based on Orientation to Hazardous Materials                | Decontamination checklist developed by researchers | -                                                                                  | -                                                                                                                                                           | -                                                                                                 |
| Dang et al., 2021 [6]      | -                                                                                                         | -                                                                                             | MCQs, 28 items                                                          | -                                                  | -                                                                                  | -                                                                                                                                                           | -                                                                                                 |
| Hardie et al., 2020 [34]   | Qualitative analysis revealed positive evaluations of the IVR                                             | -                                                                                             | -                                                                       | -                                                  | -                                                                                  | Virtual reality learning environments (VRLE) tool to investigate learners' attitudes (interaction, immersion, imagination, motivation, and problem-solving) | -                                                                                                 |
| Yang and Oh 2022 [47]      | -                                                                                                         | -                                                                                             | Neonatal resuscitation nursing knowledge measurement tool. 30 questions | -                                                  | Self-confidence tool based on contents. State-Trait Anxiety Inventory (STAI) scale | Modified Learning Motivation Test Paper                                                                                                                     | Korean version of Nurses Clinical Reasoning Scale Problem-solving ability of adults, 30 questions |
| Butt et al., 2018 [26]     | User-reaction survey developed by researchers to qualitatively measured subject's. Post 2 weeks follow-up | SUS and adjective rating scale were used to test effectiveness, efficiency, and satisfaction. |                                                                         |                                                    |                                                                                    |                                                                                                                                                             |                                                                                                   |
| Chao et al., 2021 [30]     | Feedback                                                                                                  | Satisfaction questionnaire based on contents                                                  | Nasogastric tube feeding quiz - 15 items true/false                     | -                                                  | Self-confidence tool                                                               | -                                                                                                                                                           | -                                                                                                 |

|                            |                                                                            |                                          |                                                                     |                                  |                                                                                        |                                                                                |   |
|----------------------------|----------------------------------------------------------------------------|------------------------------------------|---------------------------------------------------------------------|----------------------------------|----------------------------------------------------------------------------------------|--------------------------------------------------------------------------------|---|
| Chao et al., 2022 [29]     | Open-ended responses                                                       | Researcher-developed satisfaction survey | -                                                                   | -                                | -                                                                                      | -                                                                              | - |
| Adhikari et al., 2021 [25] | Focus group or individual interview                                        | -                                        | -                                                                   | -                                | Nursing Anxiety and Self-Confidence with Clinical Decision-Making Scale, 6-point scale | -                                                                              | - |
| Choi, 2022 [31]            | Written comments                                                           | -                                        | 20 MCQs, basic wound dressing knowledge                             | -                                | -                                                                                      | -                                                                              | - |
| Lee et al., 2020 [37]      | Open-ended qualitative questionnaire of advantages and disadvantages of VR | SUS                                      |                                                                     |                                  |                                                                                        |                                                                                |   |
| Silva et al., 2022 [39]    | -                                                                          | -                                        | -                                                                   | Nursing Skills Assessments Scale | -                                                                                      | -                                                                              | - |
| Jung and Park, 2022 [36]   | -                                                                          | Modified satisfaction scale              | Knowledge of Chemoport insertion surgery questionnaire, 10 items    | -                                | -                                                                                      | Assessment of attitudes, habits, and beliefs scale. Materials Motivation Scale | - |
| Taçgin, 2020 [45]          | -                                                                          | -                                        | Revised Simulation Effectiveness Tool (SET) 5 points scale -8 items | -                                | SET, confidence (5 items)                                                              | SET, attitude (6 items)                                                        | - |
| Samosorn et al., 2020 [41] | Presence Questionnaire (PQ) assessed the realism                           | -                                        | MCQs, 15 items                                                      | -                                | -                                                                                      | -                                                                              | - |
